# Supplementary material for: Porous reduced graphene oxide wrapped carbon nanotube–manganese dioxide nanocables with enhanced electrochemical capacitive performance
Source: Royal Society of Chemistry journal article supplement (doi:10.1039/c4ra12693a), 2014-12-04
Supplement: c4ra12693a1.pdf [file c4ra12693a1.pdf]

## Electronic Supplementary Information (ESI) for Porous reduced graphene oxide wrapped carbon nanotube- manganese dioxide nanocables with enhanced electrochemical capacitive performance

Yiran Kang,<sup>a,b</sup> Feng Cai,<sup>a,c</sup> Hongyuan Chen,<sup>a</sup> Minghai Chen,<sup>a,\*</sup> Rui Zhang,<sup>b,d</sup> and Qingwen Li<sup>a</sup>

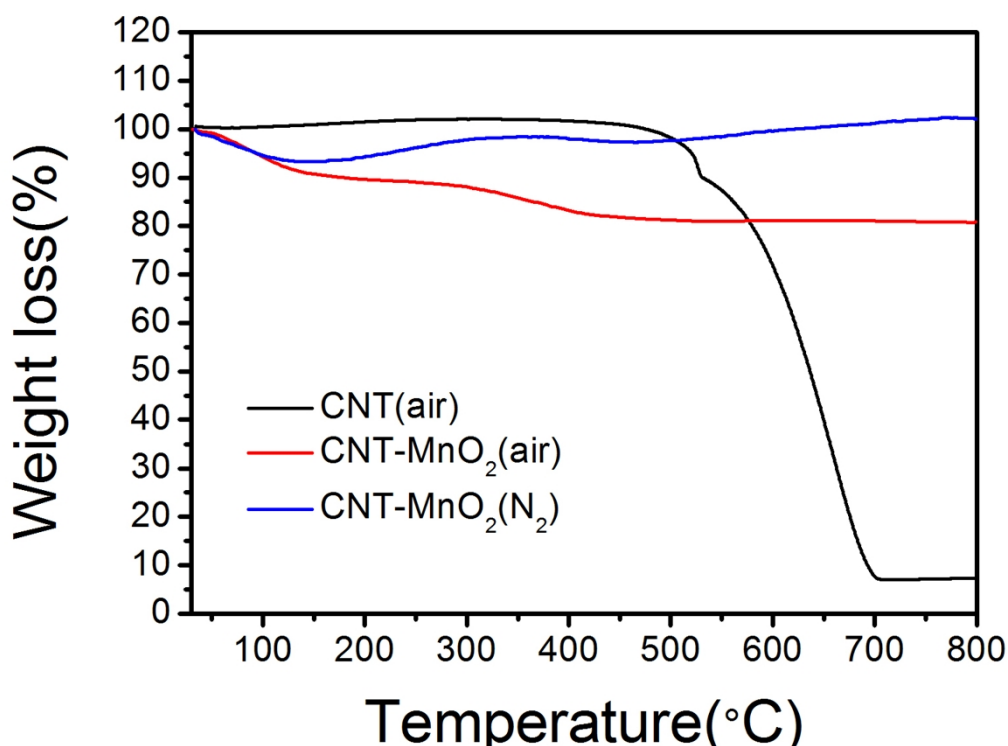

**Fig. S1** Thermogravimetric analysis of CNT and CNT-MnO<sub>2</sub> in different conditions

**Fig. S2** The optical photos of CNT-MnO<sub>2</sub> aqueous, porous-rGO aqueous and CNT-MnO<sub>2</sub>-porous rGO

Fig.S2 shows the comparison of the aqueous dispersion of CNT-MnO<sub>2</sub> nanocables, porous rGO and the mixture of the two solutions (within 1 min standing). This comparison indicated that porous rGO nanosheets could be effectively absorbed onto CNT-MnO<sub>2</sub> powder to form a wrapping structure.

**Fig. S3** Enlarged picture of Fig.5(c) at the voltage from 0.4V to 0.8V

**Fig.S4** Electrochemical performance at two-electrode: CV curves comparison of at different scan rates (a); and rate performance (b)
